# Supplementary material for: Profiling Non-Coding RNA Changes Associated with 16 Different Engineered Nanomaterials in a Mouse Airway Exposure Model
Source: Cells. 2021 May 1;10(5):1085. doi: 10.3390/cells10051085 (PMC8147388; doi:10.3390/cells10051085)
Supplement: Supplementary file 1 [file cells-10-01085-s001.zip › Table S1.xlsx]

## Sheet: Table A1
Reporter Name	ACCESSION	GENE_SYMBOL	REFSEQ	GENE_NAME
A_55_P2806194	ref|NR_015519|gb|AK136560|gb|AK168001|gb|BY518674	AI662270	NR_015519	expressed sequence AI662270
A_55_P2509373	ref|NR_102275|gb|AK036733|tc|TC1622060|riken|9830168M11	AI839979	NR_102275	expressed sequence AI839979
A_55_P2232057	ref|NR_045719|gb|AK155489|riken|F630305H02	AU022793	NR_045719	expressed sequence AU022793
A_55_P2347756	ref|NR_045305|tc|TC1672553|nap|NAP017114-001	AU040972	NR_045305	expressed sequence AU040972
A_55_P1967533	ref|NR_003623|ref|NR_033215|ens|ENSMUST00000192714|ens|ENSMUST00000133495	Gm5069	NR_003623	glyceraldehyde-3-phosphate dehydrogenase pseudogene
A_55_P2108690	ref|NR_033633|ens|ENSMUST00000095717|ens|ENSMUST00000182071|ens|ENSMUST00000182581	Gm8709	NR_033633	glyceraldehyde-3-phosphate dehydrogenase pseudogene
A_55_P2124097	ref|NR_023357|ref|NR_003623|ens|ENSMUST00000120199|ens|ENSMUST00000181461	Gm6981	NR_023357	glyceraldehyde-3-phosphate dehydrogenase pseudogene
A_55_P1995503	ref|NR_002883|nap|NAP102929-1|nap|NAP112491-1|nap|NAP111322-1	Gm5643	NR_002883	heterogeneous nuclear ribonucleoprotein A1 pseudogene
A_55_P2507824	ref|NR_028405	Marcksl1-ps4	NR_028405	MARCKS-like 1, pseudogene 4
A_51_P309589	ref|NR_024720|ens|ENSMUST00000182402|gb|AK012623|gb|AK132724	2700099C18Rik	NR_024720	NDC80 homolog, kinetochore complex component pseudogene
A_52_P1140098	gb|AK038241|gb|XR_141788|tc|TC1592188|riken|A130089I23	Gm10914		predicted gene 10914
A_66_P111231	ref|XR_392652|gb|AK047126|tc|TC1593912|riken|B930024G13	Gm10931	XR_392652	predicted gene 10931
A_66_P101624	gb|AK086245|tc|TC1703491|tc|TC1681802|riken|D930016C10	Gm11730		predicted gene 11730
A_52_P298165	gb|AK045826|gb|AK045662|tc|TC1588589|riken|B230312L03	Gm14964		predicted gene 14964
A_66_P105480	gb|AK045826|gb|AK045662|gb|BB310359|tc|TC1588589	Gm14964		predicted gene 14964
A_55_P2148321	ref|NR_040421|ref|NR_040422|gb|AK131839|riken|1810035C01	Gm15401	NR_040421	predicted gene 15401
A_51_P465758	gb|BC006619	Gm16499		predicted gene 16499
A_55_P2768695	ref|XR_384451|ref|XR_396727|gb|AK140856|riken|C130048I16	Gm16537	XR_384451	predicted gene 16537
A_55_P2011700	gb|AK090251|tc|TC1659074|riken|G630026J20|nap|NAP072971-1	Gm3364		predicted gene 3364
A_52_P66505	ref|NR_045935|gb|AK045242|tc|TC1593919|riken|B130050K08	Gm4827	NR_045935	predicted gene 4827
A_55_P1986341	ref|NR_002858|ens|ENSMUST00000082032|gb|BC061226|tc|TC1596806	Gm4956	NR_002858	predicted gene 4956
A_55_P2103706	ref|XR_865063	Gm5593	XR_865063	predicted gene 5593
A_55_P2074927	gb|AK139445|riken|A830086M05	Gm7932		predicted gene 7932
A_66_P135435	gb|AK080358|riken|A630066E19|nap|NAP089679-1	Gm9099		predicted gene 9099
A_66_P101942	ref|XR_168557|ref|XR_397495|gb|AK019325|tc|TC1764718	Gm9706	XR_168557	predicted gene 9706
A_52_P238159	gb|BC042188|gb|AK050463|gb|XR_168614|tc|TC1590067	Gm9975		predicted gene 9975
A_55_P2735057	ref|XR_385545|ref|XR_385943|ref|XR_390072|ref|XR_390274	Gm19412	XR_385545	predicted gene, 19412
A_55_P2273929	gb|AK076353|tc|TC1594141|riken|4732457N14	Gm20558		predicted gene, 20558
A_55_P2734207	ref|XR_874790|ref|XR_878928|ref|XR_874791|ref|XR_878929	Gm26908	XR_874790	predicted gene, 26908
A_66_P121975	gb|AK082843|gb|AV586744|tc|TC1626870|riken|C330041D21	Gm30146		predicted gene, 30146
A_55_P2542833	ref|XR_376954|ref|XR_402497	Gm30178	XR_376954	predicted gene, 30178
A_55_P2583271	ref|XR_397031|ref|XR_397032|ref|XR_384873|ref|XR_384874	Gm30636	XR_397031	predicted gene, 30636
A_55_P2082658	ref|XR_405043|ref|XR_387811	Gm31105	XR_405043	predicted gene, 31105
A_55_P2556201	ref|XR_873332|ref|XR_873335|ref|XR_873333|ref|XR_395118	Gm34084	XR_873332	predicted gene, 34084
A_55_P2556031	ref|XR_873470|ref|XR_873471|ref|XR_873472|ref|XR_395025	Gm38636	XR_873470	predicted gene, 38636
A_52_P31814	ref|NR_027943|ref|NR_015536|gb|AK002372|gb|AK004150	1110038B12Rik	NR_027943	RIKEN cDNA 1110038B12 gene
A_52_P354373	ref|NR_037956|ref|NR_037955|gb|AK138072|gb|AK012387	1190002F15Rik	NR_037956	RIKEN cDNA 1190002F15 gene
A_55_P2743230	gb|BC094555	1500004A13Rik		RIKEN cDNA 1500004A13 gene
A_55_P2356840	gb|BC029726|tc|TC1602903|nap|NAP021716-001	1600020E01Rik		RIKEN cDNA 1600020E01 gene
A_66_P131803	gb|AK006017|tc|TC1616752|riken|1700016D02|nap|NAP114174-1	1700016D02Rik		RIKEN cDNA 1700016D02 gene
A_55_P2185526	gb|HM627212	1700016P03Rik		RIKEN cDNA 1700016P03 gene
A_55_P2904465	ref|NR_030733|ref|NR_030734|ref|NR_030735|gb|AK007020	1700086L19Rik	NR_030733	RIKEN cDNA 1700086L19 gene
A_66_P140849	ref|NR_045287|gb|AK018977|gb|AK007099|tc|TC1742447	1700097N02Rik	NR_045287	RIKEN cDNA 1700097N02 gene
A_55_P2002773	ref|NR_040491|ref|NR_040490|ref|NR_040487|ref|NR_040486	1810053B23Rik	NR_040491	RIKEN cDNA 1810053B23 gene
A_55_P2054342	ref|NR_038009|gb|AK013046|gb|CA464200|riken|2810408I11	2810408I11Rik	NR_038009	RIKEN cDNA 2810408I11 gene
A_55_P2721985	ens|ENSMUST00000153841|gb|AK134432|riken|6030488G10	2810417H13Rik		RIKEN cDNA 2810417H13 gene
A_55_P2209053	gb|AK013461|tc|TC1617238|riken|2900001G08|nap|NAP091138-1	2900001G08Rik		RIKEN cDNA 2900001G08 gene
A_52_P489202	ref|XR_380952|ref|XR_393276|gb|AK076359|tc|TC1763051	4732465J04Rik	XR_380952	RIKEN cDNA 4732465J04 gene
A_55_P2142181	ref|NR_073028|gb|AK078204|tc|TC1593796|riken|6430504C03	4732471J01Rik	NR_073028	RIKEN cDNA 4732471J01 gene
A_66_P137773	ref|NR_030700|gb|AK149324|gb|AK029244|gb|AK163107	4831440E17Rik	NR_030700	RIKEN cDNA 4831440E17 gene
A_55_P2360266	gb|BC052524|tc|TC1628553	4833411C07Rik		RIKEN cDNA 4833411C07 gene
A_52_P209277	ref|XR_381951|gb|AK014831|gb|AK015341|riken|4921507G05	4921507G05Rik	XR_381951	RIKEN cDNA 4921507G05 gene
A_55_P2198983	gb|AI606402	4930415C11Rik		RIKEN cDNA 4930415C11 gene
A_55_P2744980	gb|EU523858|gb|EU523859|gb|AK005844|riken|1700010L24	4930444F02Rik		RIKEN cDNA 4930444F02 gene
A_66_P113183	ref|NR_102728|gb|AK015379|gb|EU523859|gb|EU523862	4930444F02Rik	NR_102728	RIKEN cDNA 4930444F02 gene
A_55_P2082060	ref|NR_131021|ref|XR_377857|ref|XR_403554|ref|XR_377861	4930512J16Rik	NR_131021	RIKEN cDNA 4930512J16 gene
A_66_P122057	ref|NR_045661|gb|AK015882|tc|NP742068|riken|4930524C18	4930524C18Rik	NR_045661	RIKEN cDNA 4930524C18 gene
A_51_P480020	ref|NR_040298|ref|NR_040299|gb|AK016444|tc|TC1605577	4931408D14Rik	NR_040298	RIKEN cDNA 4931408D14 gene
A_55_P2282421	ref|NR_045657|gb|AK017023|riken|4933432I03|nap|NAP073616-1	4933432I03Rik	NR_045657	RIKEN cDNA 4933432I03 gene
A_66_P116860	ref|NR_033624|gb|AK017144|gb|AK048747|tc|TC1629541	5031434O11Rik	NR_033624	RIKEN cDNA 5031434O11 gene
A_51_P294375	ens|ENSMUST00000194374|gb|AK017848|tc|TC1669597|riken|5730559C18	5730559C18Rik		RIKEN cDNA 5730559C18 gene
A_55_P2737019	gb|AK158263|riken|F930049B01	5930412G12Rik		RIKEN cDNA 5930412G12 gene
A_66_P117837	ref|NR_077229|ref|NR_077230|ref|NR_077231|gb|AK020235	8430426J06Rik	NR_077229	RIKEN cDNA 8430426J06 gene
A_55_P2437763	ref|NR_002849|gb|AK020237|gb|BC020133|gb|AK046503	8430431K14Rik	NR_002849	RIKEN cDNA 8430431K14 gene
A_55_P2275402	gb|AK020385|riken|9330177L23|nap|NAP078380-1	9330177L23Rik		RIKEN cDNA 9330177L23 gene
A_55_P2319468	ref|NR_015553|gb|AK051275|tc|TC1594359|riken|D130027L12	9430076C15Rik	NR_015553	RIKEN cDNA 9430076C15 gene
A_66_P133257	gb|AK044653|gb|AK044242|gb|BC099539|gb|XR_107804	9530026P05Rik		RIKEN cDNA 9530026P05 gene
A_55_P2192397	gb|AK171382|riken|F730115K06	A330023F24Rik;A330023F24Rik		RIKEN cDNA A330023F24 gene;RIKEN cDNA A330023F24 gene
A_55_P2178972	gb|AK039909|gb|XR_168796|gb|BB522533|tc|TC1622304	A430027H14Rik		RIKEN cDNA A430027H14 gene
A_52_P526740	ref|NR_027805|gb|AK079853|gb|BC064125|tc|TC1681544	A430093F15Rik	NR_027805	RIKEN cDNA A430093F15 gene
A_52_P91658	ref|NR_045989|ref|NR_045990|gb|AK044205|gb|BC051549	A930001C03Rik	NR_045989	RIKEN cDNA A930001C03 gene
A_55_P2014450	gb|AK049886|riken|C630007I02|nap|NAP022763-001	B430105G09Rik		RIKEN cDNA B430105G09 gene
A_55_P2713715	ens|ENSMUST00000124205|gb|AK157919|riken|F930007O06	B430306N03Rik		RIKEN cDNA B430306N03 gene
A_55_P2204227	gb|AK083606|tc|TC1612550|riken|D030053L23|nap|NAP085207-1	B530045E10Rik		RIKEN cDNA B530045E10 gene
A_51_P351363	ref|NR_000040|gb|M30774|nap|NAP115522-1	Tyms-ps	NR_000040	thymidylate synthase, pseudogene
A_55_P2543388	ref|XR_402771|gb|AK142627|riken|D730017M20	LOC102641211	XR_402771	uncharacterized LOC102641211
A_55_P2365902	gb|AK048087|tc|TC1606186|riken|C130033P17	C130033p17rik		uncharacterized LOC402769
A_55_P2243828	gb|AK035826|tc|TC1620116|riken|9630008J17	LOC552901		uncharacterized LOC552901
A_55_P2345853	gb|AK028406|gb|BC020436|gb|CJ239893|riken|3830612M24	3830612M24		uncharacterized protein 3830612M24
A_30_P01017619	chr5:111602486-111603075_F
A_30_P01017626	chr2:128217275-128217972_R
A_30_P01017895	chr1:175654606-175672031_R
A_30_P01018023	chr17:95150800-95180650_F
A_30_P01018246	chr1:93812836-93816128_F
A_30_P01018938	chr6:93029101-93031007_F
A_30_P01019229	chr12:33604247-33638654_R
A_30_P01020003	chr14:77511189-77522852_F
A_30_P01020075	chr9:14460976-14488051_F
A_30_P01020518	chr9:78104935-78116974_F
A_30_P01020533	chr9:106170918-106177894_F
A_30_P01020716	chr15:83181291-83197750_R
A_30_P01021193	chr5:111565658-111566257_F
A_30_P01021530	chr14:33923944-34003394_F
A_30_P01021866	chr6:116123643-116124550_F
A_30_P01022195	chr13:64381475-64415350_F
A_30_P01022866	chr8:82836971-82849309_R
A_30_P01023554	chr17:34018371-34019394_R
A_30_P01024137	chr11:69196530-69197001_F
A_30_P01024284	chr5:111538420-111540142_F
A_30_P01024606	chr5:35975265-35982561_F
A_30_P01024894	chr15:97495641-97503721_F
A_30_P01024970	chr10:83181374-83249774_F
A_30_P01026145	chr4:32294119-32294941_F
A_30_P01026324	chr4:149383134-149451259_R
A_30_P01026746	chr8:129336539-129400338_R
A_30_P01027000	chr8:59994102-59994797_F
A_30_P01027115	chr17:26911397-26917047_F
A_30_P01027330	chr5:124667541-124700029_R
A_30_P01027526	chr11:95113972-95114267_F
A_30_P01027809	chr12:117623500-117643575_R
A_30_P01027960	chr8:123589645-123606932_R
A_30_P01028956	chr1:193815525-193825775_F
A_30_P01029964	chr10:117021051-117038683_F
A_30_P01030304	chr5:112205091-112240992_R
A_30_P01030356	chr19:46419916-46421753_F
A_30_P01030698	chr11:16831925-16851121_R
A_30_P01031738	chr6:116092274-116144199_R
A_30_P01031942	chr12:89448550-89461843_F
A_30_P01032196	chr16:84708695-84708806_F
A_30_P01032425	chr8:26345571-26346095_R
A_30_P01032460	chr10:83185606-83225506_F
A_30_P01033039	chr2:128211990-128215223_R
A_30_P01033054	chr5:35893909-35899497_F
A_30_P01033587	chr6:91133122-91133347_R
A_51_P237746	gb|AK004226|tc|TC1596987|riken|1110051A18|nap|NAP021060-001
A_51_P318123	gb|AK084660|gb|AK155224|tc|TC1670614|riken|D330026H24
A_51_P505521	ens|ENSMUST00000102977|gb|BC019757|gb|AK011560|gb|BC052219
A_52_P1109107	gb|BE307515|tc|TC1710487|tc|TC1648492
A_52_P218883	ens|ENSMUST00000088648|nap|NAP101638-1
A_52_P229210	ens|ENSMUST00000183020|nap|NAP061773-1|nap|NAP028542-1
A_52_P258606	ens|ENSMUST00000194613|gb|AK081980|gb|AK035097|tc|TC1597770
A_52_P272054	ens|ENSMUST00000120913|nap|NAP000003-013
A_52_P313570	ens|ENSMUST00000117941|nap|NAP070973-1|nap|NAP068914-1
A_52_P318073	ens|ENSMUST00000198525|nap|NAP102625-1|nap|NAP100369-001
A_52_P395508	ens|ENSMUST00000182528|nap|NAP027859-1|nap|NAP060552-1
A_52_P427640	ens|ENSMUST00000163110|nap|NAP014889-001
A_52_P430427	ens|ENSMUST00000181451|nap|NAP030221-1|nap|NAP058745-1
A_52_P434306	tc|TC1681647|nap|NAP063397-1
A_52_P532370	ens|ENSMUST00000182326|nap|NAP028877-1|nap|NAP062968-1
A_52_P62973	ens|ENSMUST00000121653|nap|NAP028712-1|nap|NAP060887-1
A_52_P644984	ens|ENSMUST00000119554|nap|NAP000003-005
A_52_P653406	gb|CO430613|tc|TC1636111|nap|NAP047317-1
A_52_P654437	ens|ENSMUST00000122262|nap|NAP061234-1|nap|NAP071085-1
A_52_P657123	nap|NAP101526-1|nap|NAP112884-1
A_52_P674886	gb|CF750939|tc|TC1671308|nap|NAP051645-1
A_52_P76196	nap|NAP000014-005
A_52_P795929	gb|AK081614|riken|C130051K14
A_52_P82765	tc|NP065022|nap|NAP112024-1
A_52_P92404	ens|ENSMUST00000182375|nap|NAP018402-001
A_55_P1961414	ens|ENSMUST00000182237
A_55_P1964078	ens|ENSMUST00000196905|nap|NAP113120-1
A_55_P1968664	nap|NAP111351-1
A_55_P1971093	ens|ENSMUST00000119515|nap|NAP096516-001|nap|NAP111591-1
A_55_P1973560	ens|ENSMUST00000117514
A_55_P1990067	nap|NAP097565-001
A_55_P1993933	ens|ENSMUST00000140484|tc|NP1260051|nap|NAP018812-001
A_55_P1997926	ens|ENSMUST00000118177
A_55_P2001072	ens|ENSMUST00000184810|nap|NAP071120-1|nap|NAP060460-1
A_55_P2001901	ens|ENSMUST00000064032|ref|XR_874491|ref|XR_877384|ref|XR_874492		XR_874491
A_55_P2004153	ens|ENSMUST00000121403|ens|ENSMUST00000072570|ref|XR_867784|ref|XR_887365		XR_867784
A_55_P2004637	nap|NAP111546-1|nap|NAP111671-1
A_55_P2005719	ens|ENSMUST00000119237|tc|TC1700577|nap|NAP070997-1
A_55_P2011490	ens|ENSMUST00000153501|ens|ENSMUST00000120483|ens|ENSMUST00000165525|nap|NAP100452-001
A_55_P2021908	ens|ENSMUST00000119692
A_55_P2025937	ens|ENSMUST00000087884
A_55_P2026214	ens|ENSMUST00000071770|nap|NAP027141-1
A_55_P2029252	nap|NAP057035-1
A_55_P2037689	ens|ENSMUST00000118339
A_55_P2051166	nap|NAP114173-1
A_55_P2053616	nap|NAP060629-1
A_55_P2054128	ens|ENSMUST00000182329|nap|NAP059626-1
A_55_P2058601	ens|ENSMUST00000064271|gb|AK077025|gb|AV273793|tc|TC1587491
A_55_P2060938	ens|ENSMUST00000119811|nap|NAP061055-1
A_55_P2067153	ens|ENSMUST00000183329|ens|ENSMUST00000087222
A_55_P2069337	ens|ENSMUST00000099328|ens|ENSMUST00000199220|nap|NAP094608-001|nap|NAP111883-1
A_55_P2077635	ens|ENSMUST00000168753|ens|ENSMUST00000177813
A_55_P2078460	ens|ENSMUST00000121510|nap|NAP111472-1
A_55_P2081137	ens|ENSMUST00000181990|ens|ENSMUST00000180973|nap|NAP060031-1
A_55_P2091230	ens|ENSMUST00000121155|nap|NAP113008-1
A_55_P2091247	ens|ENSMUST00000166539|ens|ENSMUST00000119851|ens|ENSMUST00000121760|ens|ENSMUST00000118182
A_55_P2092046	ens|ENSMUST00000181115|nap|NAP058897-1
A_55_P2099750	ens|ENSMUST00000121695|nap|NAP093855-001
A_55_P2104790	ens|ENSMUST00000119217|ens|ENSMUST00000117295|ens|ENSMUST00000120203|ens|ENSMUST00000095471
A_55_P2109505	nap|NAP097543-001
A_55_P2112355	nap|NAP103489-1
A_55_P2112701	ens|ENSMUST00000122085|ens|ENSMUST00000182962|ens|ENSMUST00000118175|ens|ENSMUST00000122207
A_55_P2117081	ens|ENSMUST00000103558|ens|ENSMUST00000103561|ens|ENSMUST00000164407|ens|ENSMUST00000198163
A_55_P2118309	nap|NAP095734-001
A_55_P2118537	ens|ENSMUST00000118082
A_55_P2122841	nap|NAP114472-1
A_55_P2124096	ens|ENSMUST00000120199
A_55_P2127179	ens|ENSMUST00000178160|nap|NAP023935-001
A_55_P2133679	ens|ENSMUST00000182336|ens|ENSMUST00000182369|ens|ENSMUST00000121923|ens|ENSMUST00000182581
A_55_P2133680	ens|ENSMUST00000182336|ens|ENSMUST00000117732|ens|ENSMUST00000116649|ens|ENSMUST00000198475
A_55_P2135023	ens|ENSMUST00000182773
A_55_P2135049	ens|ENSMUST00000182864|ens|ENSMUST00000179088|nap|NAP028846-1
A_55_P2136334	ens|ENSMUST00000121414|nap|NAP030013-1
A_55_P2143934	ens|ENSMUST00000062642|gb|BC147682|gb|BC147695|tc|TC1709791
A_55_P2150976	nap|NAP111439-1
A_55_P2152836	ens|ENSMUST00000120343
A_55_P2160204	nap|NAP060545-1
A_55_P2164139	tc|TC1651530|nap|NAP112120-1|nap|NAP114384-1
A_55_P2164841	nap|NAP111509-1
A_55_P2166555	ens|ENSMUST00000153890|tc|TC1777290
A_55_P2185359	ens|ENSMUST00000182661|nap|NAP000003-008
A_55_P2186395	nap|NAP026363-1
A_55_P2366358	gb|AK086457|riken|D930030E17|nap|NAP087407-1
A_55_P2720435	ens|ENSMUST00000153206
A_55_P2722363	ens|ENSMUST00000130867|ens|ENSMUST00000194613|gb|AK035097|gb|AK081980
A_55_P2722741	ens|ENSMUST00000121933
A_55_P2847248	ens|ENSMUST00000161226|ens|ENSMUST00000071591|gb|AK084361|gb|AK147478
A_65_P20589	gb|BY764083
A_66_P101575	ens|ENSMUST00000182170|nap|NAP059900-1
A_66_P102046	ens|ENSMUST00000182565
A_66_P104393	ens|ENSMUST00000182240|nap|NAP063241-1
A_66_P104696	ens|ENSMUST00000121568
A_66_P105089	gb|AK163151|gb|AK046052|riken|A730040F03|riken|B230338A04
A_66_P105123	gb|AK136349|tc|TC1635241|riken|8130401D08
A_66_P105518	ens|ENSMUST00000180655|nap|NAP058731-1
A_66_P106789	ens|ENSMUST00000169692|nap|NAP014486-001
A_66_P106968	ens|ENSMUST00000182630|nap|NAP111412-1
A_66_P107190	gb|AK035988|gb|BB127709|tc|TC1685949|tc|TC1626840
A_66_P109612	ens|ENSMUST00000121385
A_66_P111858	ens|ENSMUST00000121383
A_66_P116360	ens|ENSMUST00000118899|nap|NAP000479-001
A_66_P116378	ens|ENSMUST00000182201|nap|NAP062532-1
A_66_P118307	ens|ENSMUST00000182962
A_66_P118843	ens|ENSMUST00000121258|nap|NAP017510-001
A_66_P126311	gb|BM942098|tc|TC1699395
A_66_P127084	ens|ENSMUST00000182847|nap|NAP059713-1
A_66_P128490	ens|ENSMUST00000182998
A_66_P131205	ens|ENSMUST00000182071|ref|XR_883487		XR_883487
A_66_P131921	gb|AK028675|gb|AV239157|tc|TC1608894|riken|4732432D20
A_66_P132359	gb|AK086931|gb|BB530995|tc|TC1626206|riken|E030012M20
A_66_P135970	ens|ENSMUST00000120962|nap|NAP058448-1
A_66_P136364	ens|ENSMUST00000182514|nap|NAP026415-1|nap|NAP111664-1
A_66_P136793	ens|ENSMUST00000182893|nap|NAP062391-1
A_66_P138011	gb|BB777540
A_66_P138491	ens|ENSMUST00000122157|nap|NAP061969-1
A_66_P139927	ens|ENSMUST00000181445|nap|NAP061600-1
A_66_P140076	ens|ENSMUST00000181978
A_66_P140307	ens|ENSMUST00000180794|nap|NAP058906-1
